# Supplementary material for: Whole genome sequencing of CCR5 CRISPR-Cas9-edited Mauritian cynomolgus macaque blastomeres reveals large-scale deletions and off-target edits
Source: PubMed Central journal article supplement (PMC9877282; doi:10.3389/fgeed.2022.1031275), 2023-01-12

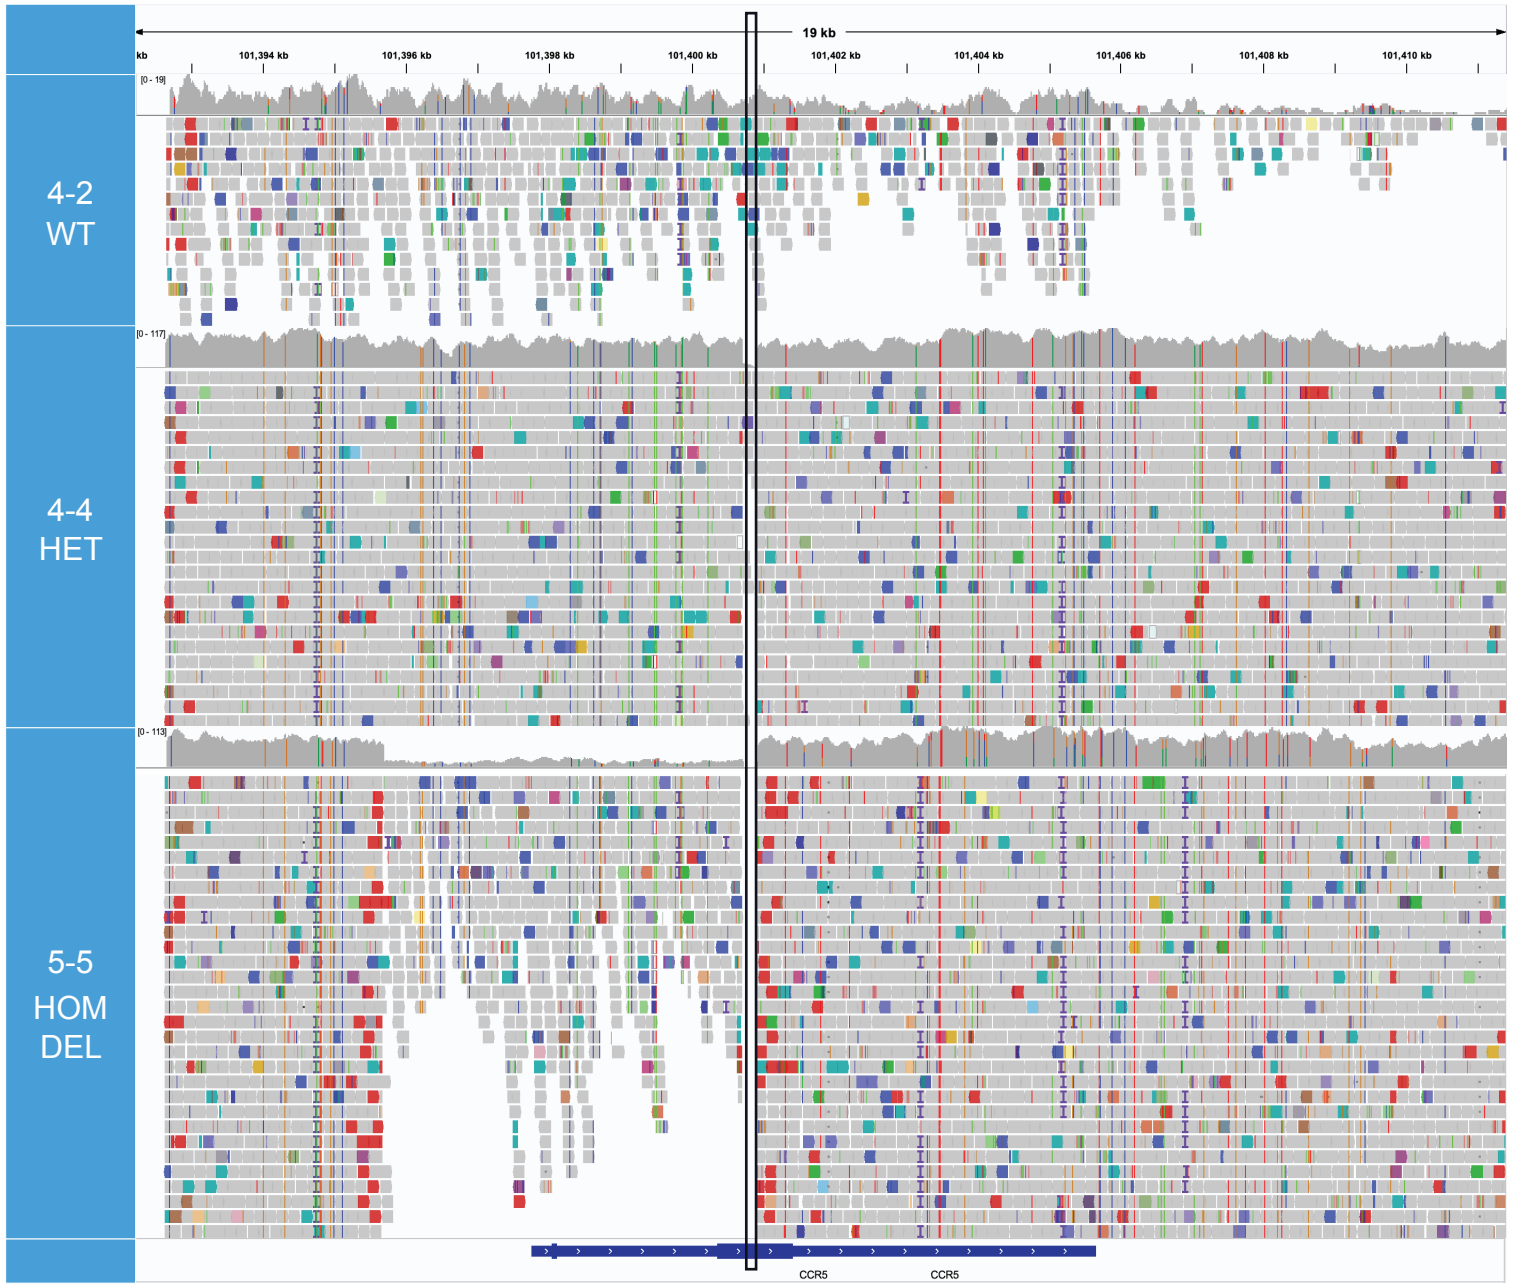

Supplement: Image1.pdf [file Image1.pdf]
